# Supplementary material for: Evaluation of an eye tracking setup for studying visual attention in face-to-face conversations
Source: PubMed Central journal article supplement (PMC7846602; doi:10.1038/s41598-021-81987-x), 2021-01-29
Supplement: 41598_2021_81987_MOESM1_ESM.pdf [file 41598_2021_81987_MOESM1_ESM.pdf]

**Evaluation of an eye tracking setup for studying visual attention in face-to-face  
conversations**

Antonia Vehlen<sup>1</sup>, Ines Spenthof<sup>2</sup>, Daniel Tönsing<sup>2</sup>, Markus Heinrichs<sup>2</sup>, and Gregor Domes<sup>1</sup>

<sup>1</sup>Department of Biological and Clinical Psychology, University of Trier

<sup>2</sup>Department of Psychology, Laboratory for Biological and Personality Psychology, Albert-  
Ludwigs-University of Freiburg

**Supplementary figure S1. Association of accuracy and movements of the conversation partner during speaking and listening of the participant in a face-to-face conversation.** *S = participant speaking and L = participant listening. Uncorrected p-values.*

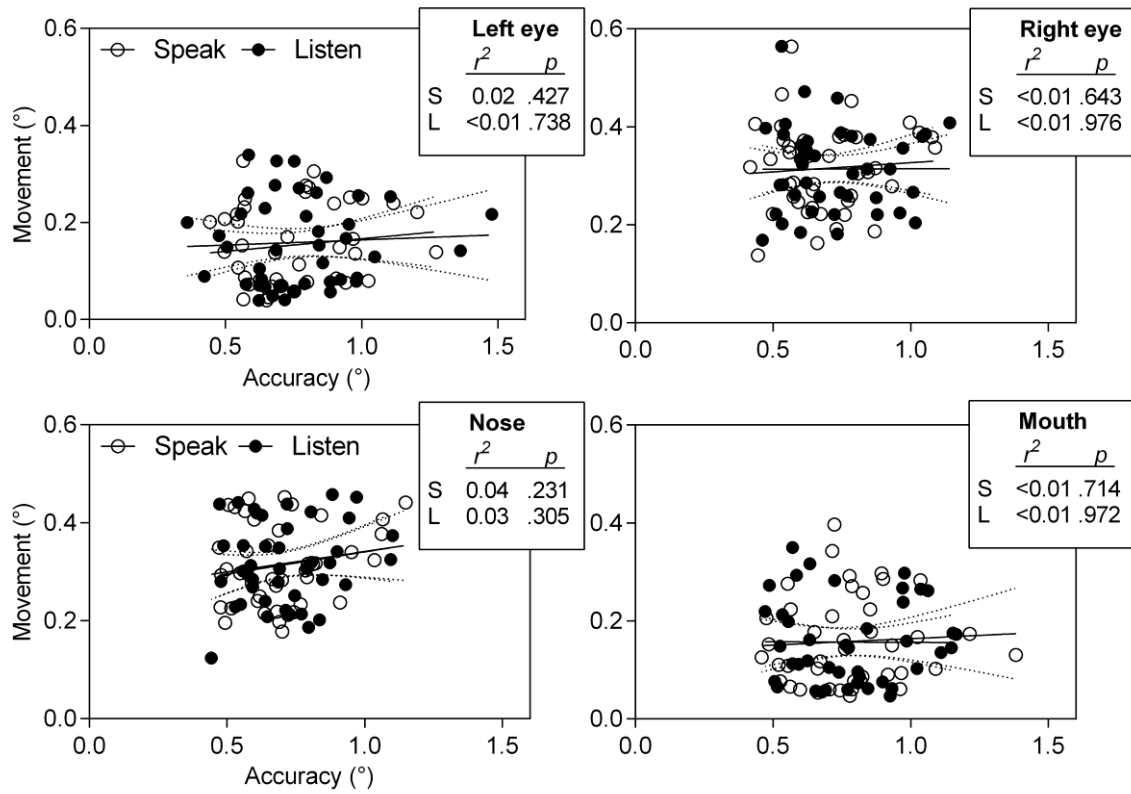

**Supplementary figure S2. Association of precision and movements of the conversation partner during speaking and listening of the participant in a face-to-face conversation. *S* = participant speaking and *L* = participant listening. Uncorrected *p*-values.**

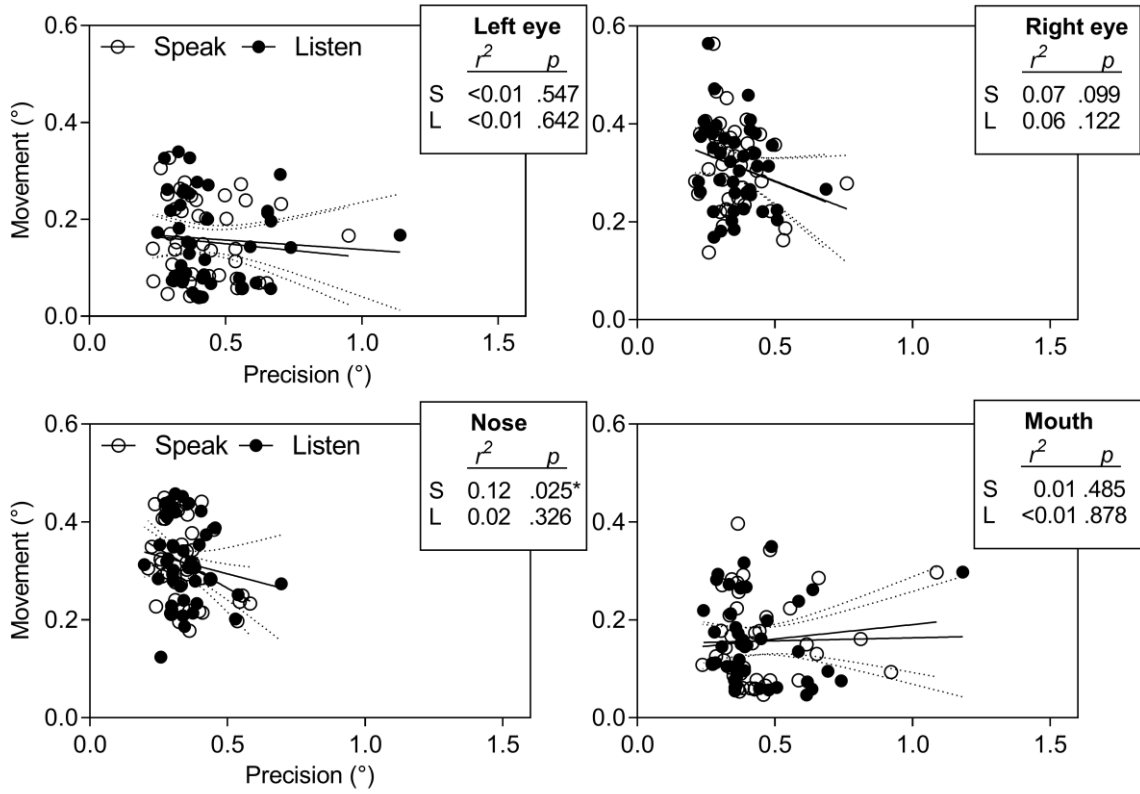

**Supplementary video S1. A 10 sec sample sequence from a conversation of Study 3 showing the research assistant interacting with a participant (not shown). The red dot visualizes the participants' gaze point, while the white dots correspond to the target points defining the AOIs.**

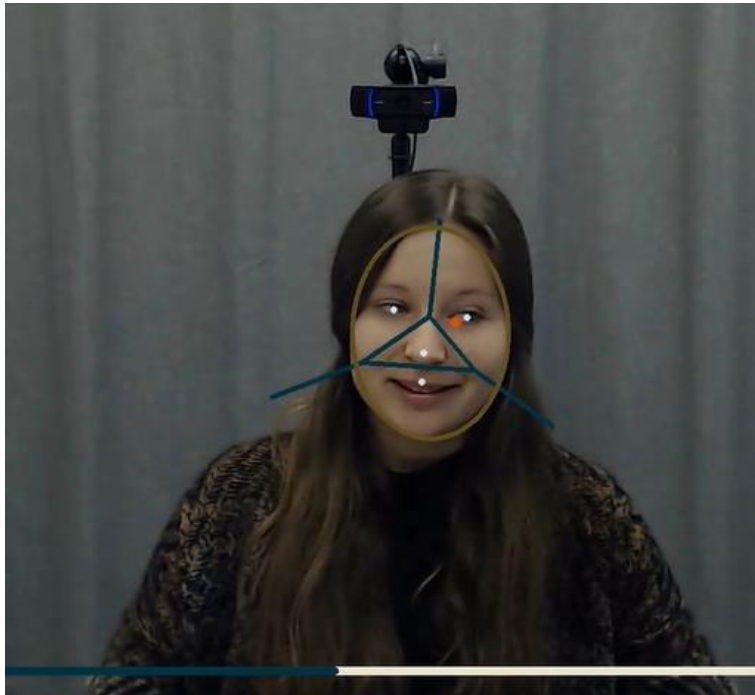

*Screenshot*
